# Supplementary material for: Accelerating Onset of Puberty Through Modification of Early Life Nutrition Induces Modest but Persistent Changes in Bull Sperm DNA Methylation Profiles Post-puberty
Source: Front Genet. 2020 Aug 26;11:945. doi: 10.3389/fgene.2020.00945 (PMC7479244; doi:10.3389/fgene.2020.00945)
Supplement: Supplementary file 4 [file Table_4.XLSX]

## Sheet: Supplementary Table 4
Supplementary Table 4. Average daily gain (kg/day; mean ± standard error) of Holstein-Friesian bulls offered a high (H)
or moderate (M) plane of nutrition pre and post six months of age
Period of life	HM	MM
Pre-weaning	0.61 ± 0.060	0.52 ± 0.047
Pre-six months	1.00 ± 0.066	0.60 ± 0.032
Post-six months	0.68 ± 0.072	0.99 ± 0.037
Overall	0.91 ± 0.035	0.63 ± 0.067
